# Supplementary material for: Nash Equilibria with Incomplete Preferences: A Strategic Completion Approach
Source: Springer Nature journal article supplement (doi:10.1007/s10726-025-09945-w), 2025-09-18
Supplement: MOESM2 [file 10726_2025_9945_MOESM2_ESM.pdf]

|                 |           | <i>Player 2</i>                                                                        |                                                                                        |                                                                                       |
|-----------------|-----------|----------------------------------------------------------------------------------------|----------------------------------------------------------------------------------------|---------------------------------------------------------------------------------------|
|                 |           | $L^{(2)}$                                                                              | $M^{(2)}$                                                                              | $H^{(2)}$                                                                             |
| <i>Player 1</i> | $L^{(1)}$ | $\begin{pmatrix} 24 \\ 28 \end{pmatrix} \begin{pmatrix} 5.18 \\ 7 \end{pmatrix}$       | $\begin{pmatrix} 10.4 \\ 14.4 \end{pmatrix} \begin{pmatrix} 3.56 \\ 7.2 \end{pmatrix}$ | $\begin{pmatrix} 7.6 \\ 11.6 \end{pmatrix} \begin{pmatrix} 3.24 \\ 8.7 \end{pmatrix}$ |
|                 | $M^{(1)}$ | $\begin{pmatrix} 30 \\ 36 \end{pmatrix} \begin{pmatrix} 4.18 \\ 6 \end{pmatrix}$       | $\begin{pmatrix} 13.2 \\ 19.2 \end{pmatrix} \begin{pmatrix} 2.76 \\ 6.4 \end{pmatrix}$ | $\begin{pmatrix} 9 \\ 15 \end{pmatrix} \begin{pmatrix} 2.04 \\ 7.5 \end{pmatrix}$     |
|                 | $H^{(1)}$ | $\begin{pmatrix} 26.6 \\ 33.6 \end{pmatrix} \begin{pmatrix} 2.98 \\ 4.8 \end{pmatrix}$ | $\begin{pmatrix} 10.5 \\ 17.5 \end{pmatrix} \begin{pmatrix} 1.36 \\ 5 \end{pmatrix}$   | $\begin{pmatrix} 7 \\ 14 \end{pmatrix} \begin{pmatrix} 0.54 \\ 6 \end{pmatrix}$       |

TABLE 5. Payoff matrix.
